# Supplementary material
Source: PubMed Central journal article supplement (PMC6832010)
Supplement: EMBR-20-e48647-s001.pdf [file EMBR-20-e48647-s001.pdf]

## Expanded View Figures

**Figure EV1. Gating strategy for the identification of  $\gamma\delta$ T17 cells by flow cytometry in lymph nodes and ear skin and assessment of the  $\text{ROR}\gamma^{\text{CRE}}$  efficiency.**

Flow cytometric analysis of  $\gamma\delta$  T cells to indicate the gating strategy used to identify  $\gamma\delta$ T17 cells in lymph node and skin and to assess the efficiency of the  $\text{ROR}\gamma^{\text{CRE}}$ . In graph, each symbol represents a mouse and line the median.

A, B Gating strategy in the lymph node (A) and skin (B).

C  $\text{ROR}\gamma^{\text{CRE}}$  mice were crossed with ROSA26-STOPflox-RFP mice ( $\text{ROR}\gamma^{\text{CRE}}$ -RFP<sup>STOP-F/F</sup>), whereby the floxed STOP cassette in front of the red fluorescent protein (RFP) gene prevents its constitutive driven expression by the ROSA26 locus until Cre recombinase-mediated excision. The graph summarizes data from 4 mice. Each color represents a cell population.

Data information: In all FACS plots, numbers in gates indicate % of positive cells.

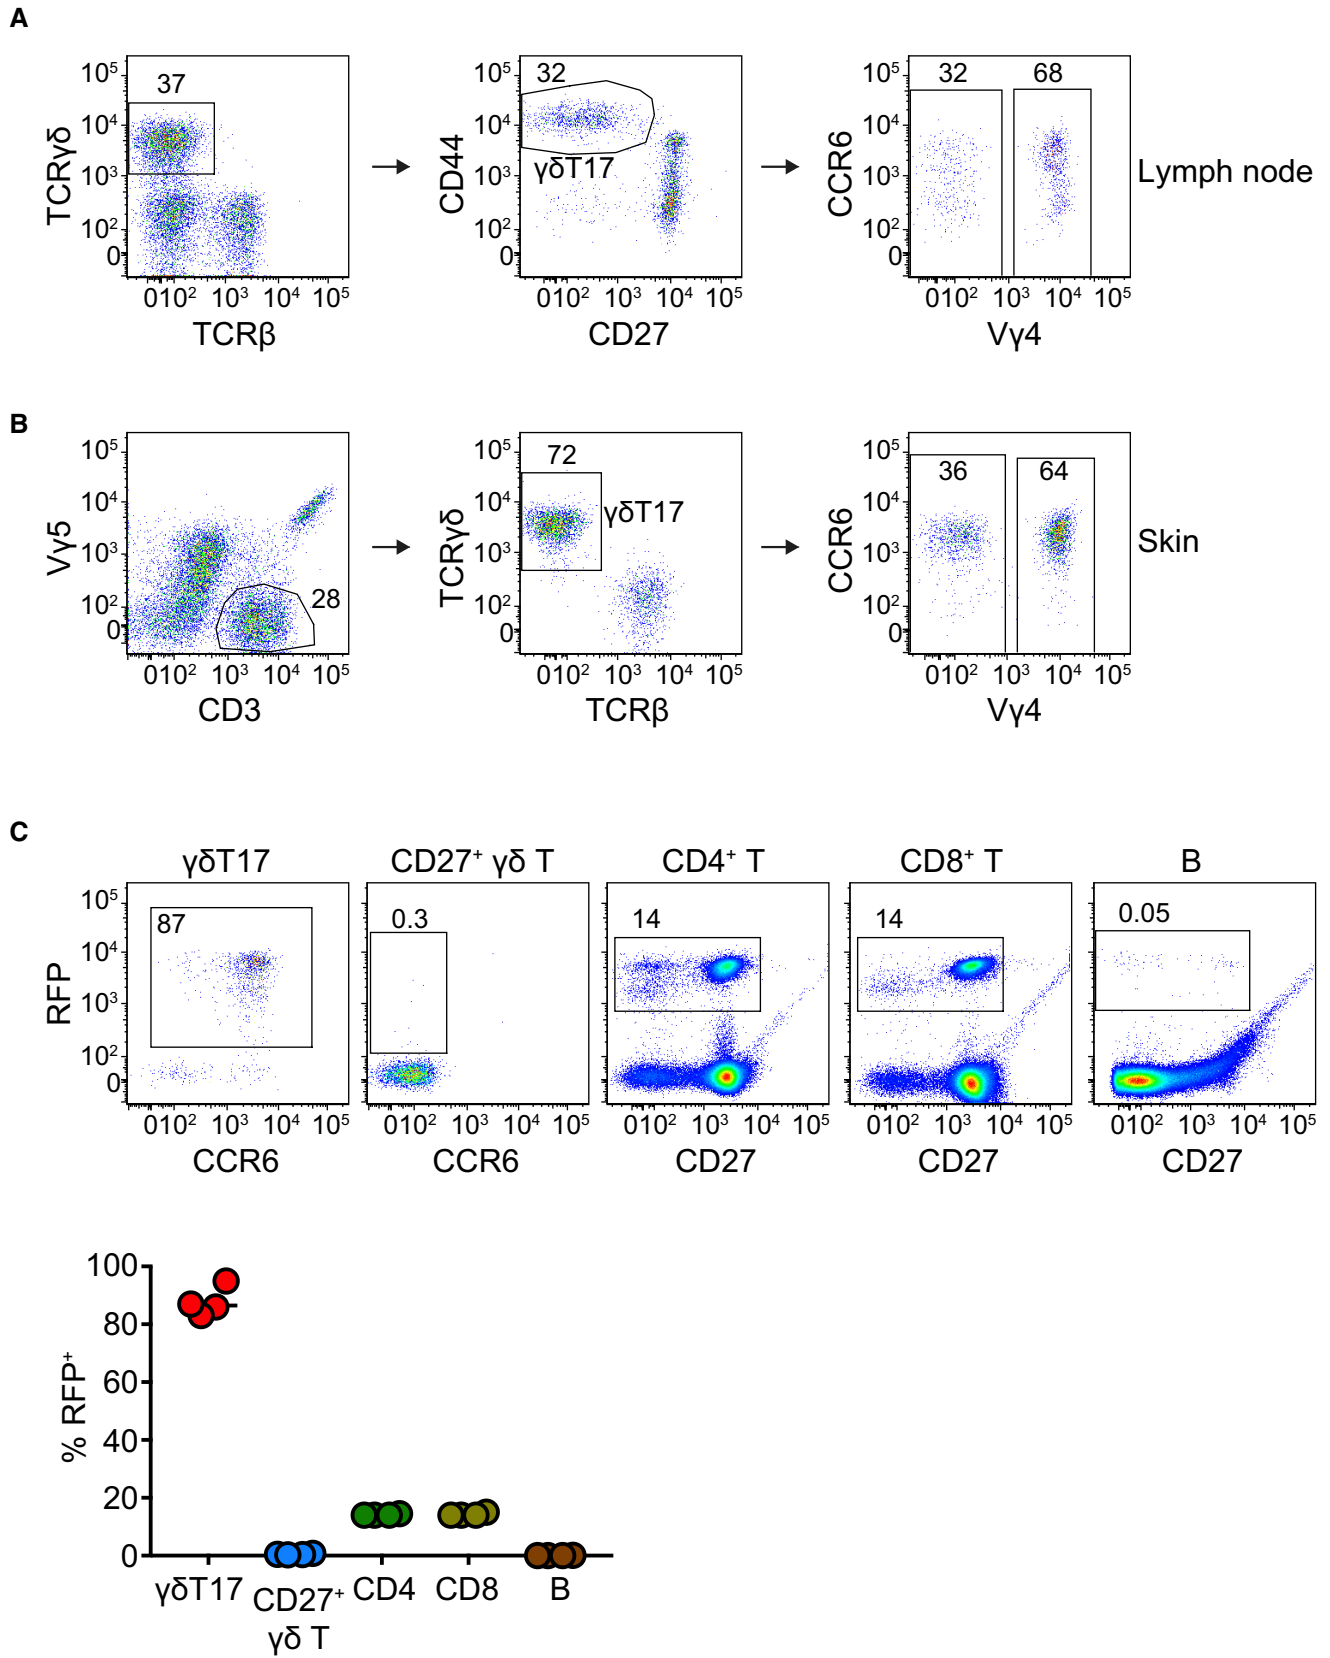

Figure EV1.

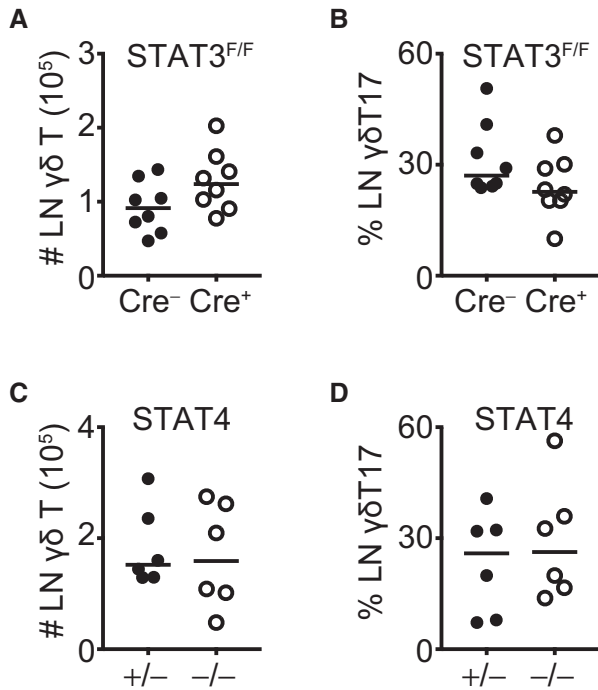

**Figure EV2. STAT3 and STAT4 do not regulate  $\gamma\delta$  T and  $\gamma\delta$ T17 cell numbers in the lymph nodes.**

Flow cytometric analysis of  $\gamma\delta$  T cells in  $ROR\gamma^t^{CRE-STAT3^{F/F}}$  ( $Cre^+$ ) and littermate control mice ( $Cre^-$ ) (A–B) or in  $STAT4^{-/-}$  ( $-/-$ ) and littermate control mice ( $+/-$ ) (C–D). In graphs, each symbol represents a mouse and line the median.

A Numbers of total  $\gamma\delta$  T cells in the LN of  $ROR\gamma^t^{CRE-STAT3^{F/F}}$  mice.

B Frequency of  $\gamma\delta$ T17 cells (% of total  $\gamma\delta$  T) in the LN of  $ROR\gamma^t^{CRE-STAT3^{F/F}}$  mice.

C Numbers of total  $\gamma\delta$  T cells in the LN of  $STAT4^{-/-}$  mice.

D Frequency of  $\gamma\delta$ T17 cells (% of total  $\gamma\delta$  T) in the LN of  $STAT4^{-/-}$  mice.

Data information: In (A–B),  $n = 8$ ; 4 experiments. In (C, D),  $n = 6$ ; 3 experiments.

**Figure EV3. Impact of STAT3 and STAT4 on  $V\gamma 4^+$  and  $V\gamma 4^-$   $\gamma\delta$ T17 subsets in the lymph node and skin at steady state and during inflammation.**

Flow cytometric analysis of  $\gamma\delta$  T cells in  $ROR\gamma^t^{CRE-STAT3^{F/F}}$  ( $Cre^+$ ) and littermate control mice ( $Cre^-$ ) (A–D) or in  $STAT4^{-/-}$  ( $-/-$ ) and littermate control mice ( $+/-$ ) (E–H). In graphs, each symbol represents a mouse and line the median. \* $P < 0.05$ , \*\* $P < 0.01$ , \*\*\* $P < 0.001$  using Mann–Whitney test.

A–H (A, B and E, F) Numbers of  $V\gamma 4^+$  (A and E) and  $V\gamma 4^-$  (B and F)  $\gamma\delta$ T17 cells in the LN before (steady state) and after IMQ-induced psoriasis in  $ROR\gamma^t^{CRE-STAT3^{F/F}}$  (A, B) or  $STAT4^{-/-}$  (E, F) mice. Steady state:  $n = 7$ –8; 4 experiments, IMQ:  $n = 11$ –12; 4 experiments. (C, D and G, H) Numbers of  $V\gamma 4^+$  (C and G) and  $V\gamma 4^-$  (D and H)  $\gamma\delta$ T17 cells in the skin before (steady state) and after IMQ-induced psoriasis in  $ROR\gamma^t^{CRE-STAT3^{F/F}}$  (C, D) or  $STAT4^{-/-}$  (G, H) mice. Steady state:  $n = 7$ –8; 4 experiments, IMQ:  $n = 11$ –12; 4 experiments.

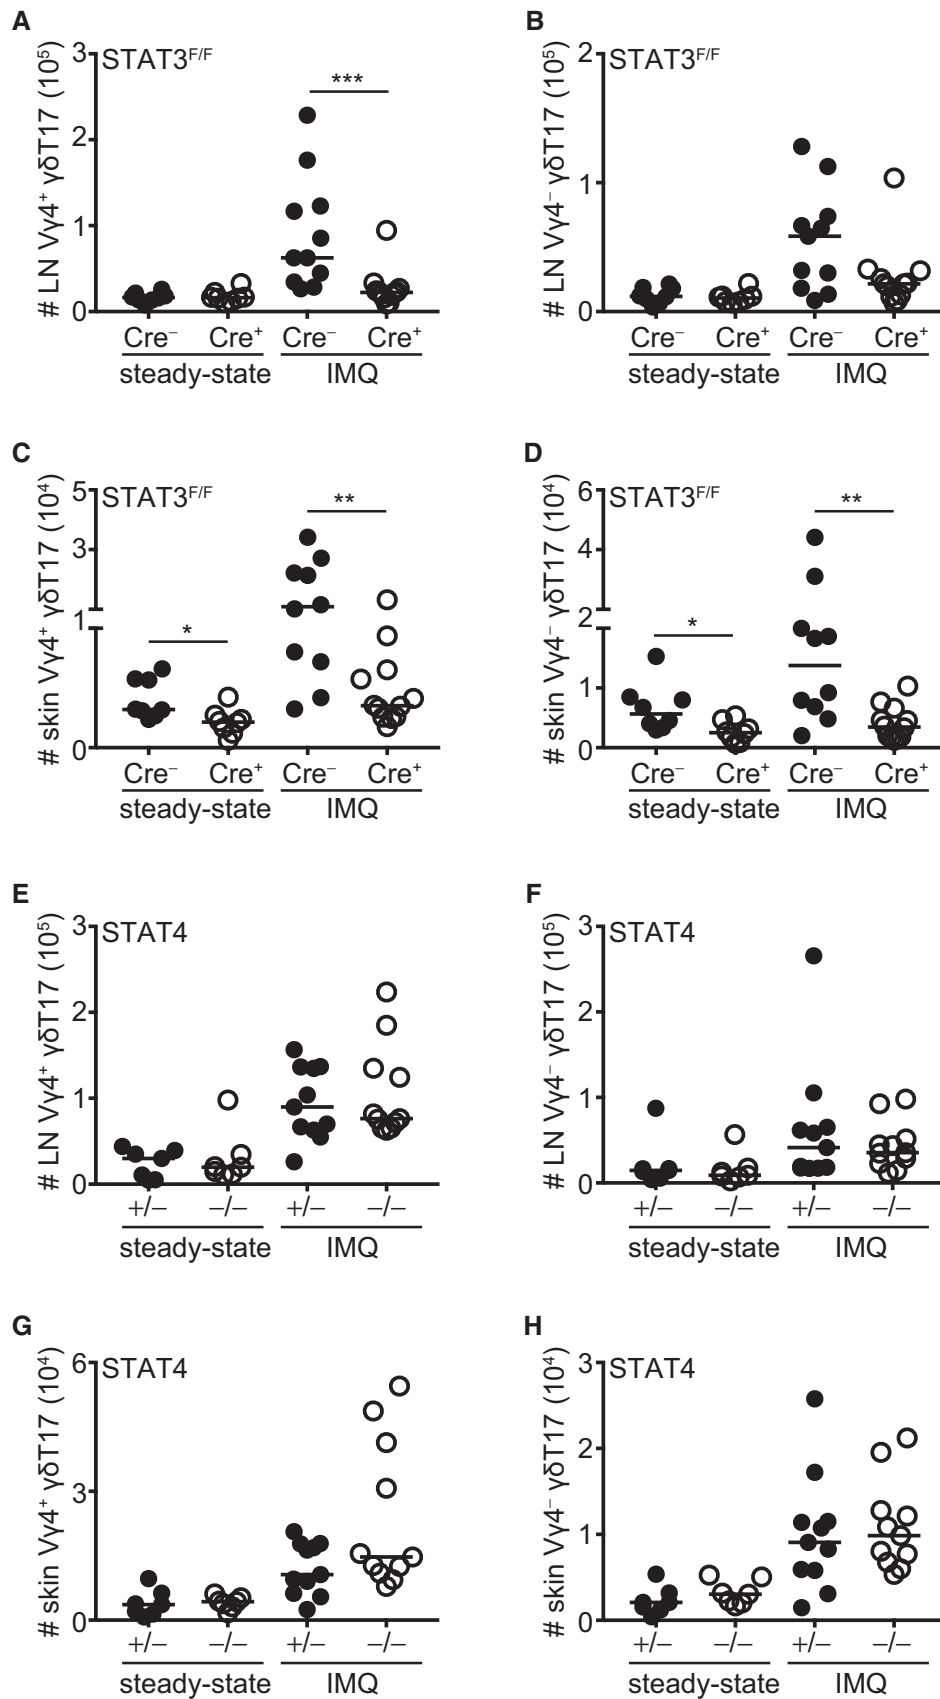

Figure EV3.

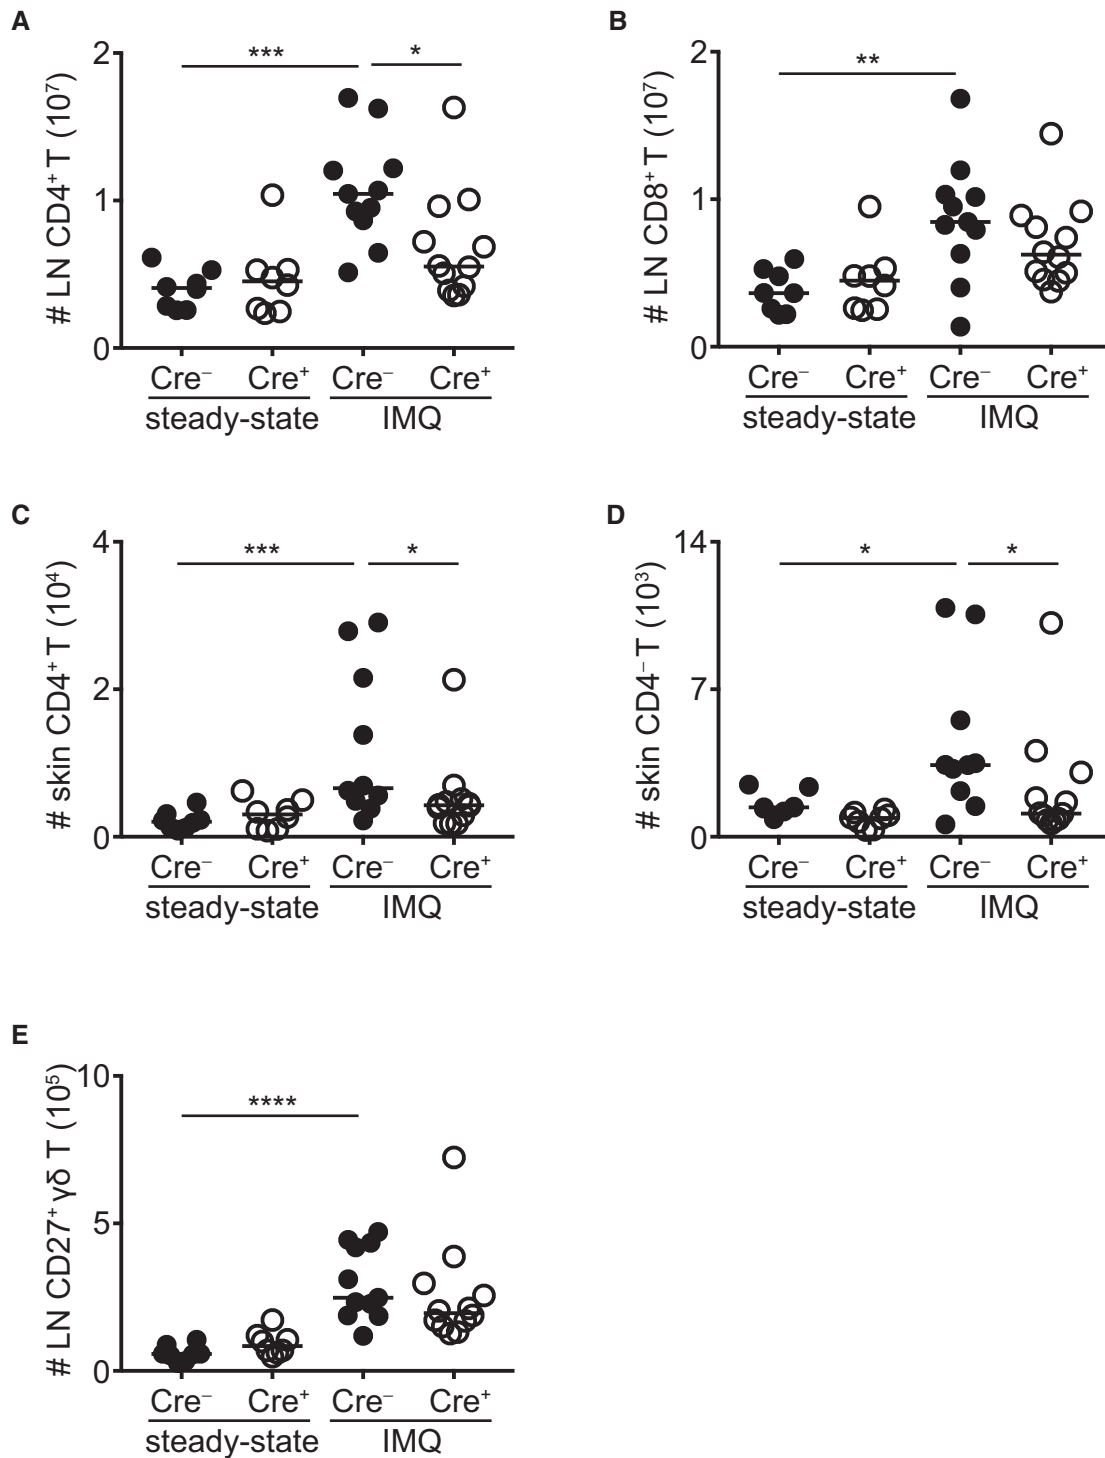

**Figure EV4. Impact of STAT3 on non- $\gamma\delta T17$  cell populations.**

Flow cytometric analysis of lymph node or skin lymphocytes in  $ROR\gamma t^{Cre}-STAT3^{F/F}$  ( $Cre^{+}$ ) and littermate control mice ( $Cre^{-}$ ). In graphs, each symbol represents a mouse and line the median. \* $P < 0.05$ , \*\* $P < 0.01$ , \*\*\* $P < 0.001$ , \*\*\*\* $P < 0.0001$  using Mann-Whitney test.

A, B Numbers of LN  $CD4^{+}$  and  $CD8^{+}$  T cells before (steady state) and after IMQ treatment.

C, D Numbers of skin  $CD4^{+}$  and  $CD4^{-}$  T cells before (steady state) and after IMQ treatment.

E Numbers of LN  $CD27^{+}\gamma\delta$  T cells before (steady state) and after IMQ treatment.

Data information: Steady state:  $n = 8$ ; 4 experiments, IMQ:  $n = 11-12$ ; 4 experiments.

**Figure EV5. Contribution of  $\gamma\delta$  and  $\alpha\beta$  T cells toward production of IL-17A, IL-17F, and IL-22 during IMQ-induced inflammation.**

Flow cytometric analysis of IL-17A-, IL-17F-, and IL-22-producing T cells in the lymph node during IMQ-induced inflammation. In graphs, each symbol represents a mouse and line the median. \*\*\* $P < 0.001$ , \*\*\*\* $P < 0.0001$  using Mann–Whitney test.

- A, B Frequency of IL-17A<sup>+</sup> (A) or IL-17F<sup>+</sup> (B) cells that are either TCR $\gamma\delta$ <sup>+</sup> or TCR $\beta$ <sup>+</sup> within the total IL-17A- or IL-17F-producing population.
- C Frequency of IL-22<sup>+</sup> cells that are either TCR $\gamma\delta$ <sup>+</sup> or TCR $\beta$ <sup>+</sup> within the total IL-17A-producing population.
- D Frequency of CD4<sup>+</sup> and CD4<sup>-</sup> IL-22<sup>+</sup> T cells in ROR $\gamma$ <sup>CRE</sup>-STAT3<sup>F/F</sup> (Cre<sup>+</sup>) and littermate control mice (Cre<sup>-</sup>) at steady state or after IMQ treatment.

Data information: (A–D)  $n = 8$ –11; 3–4 experiments. In FACS plots, numbers in gate indicate % positive cells.

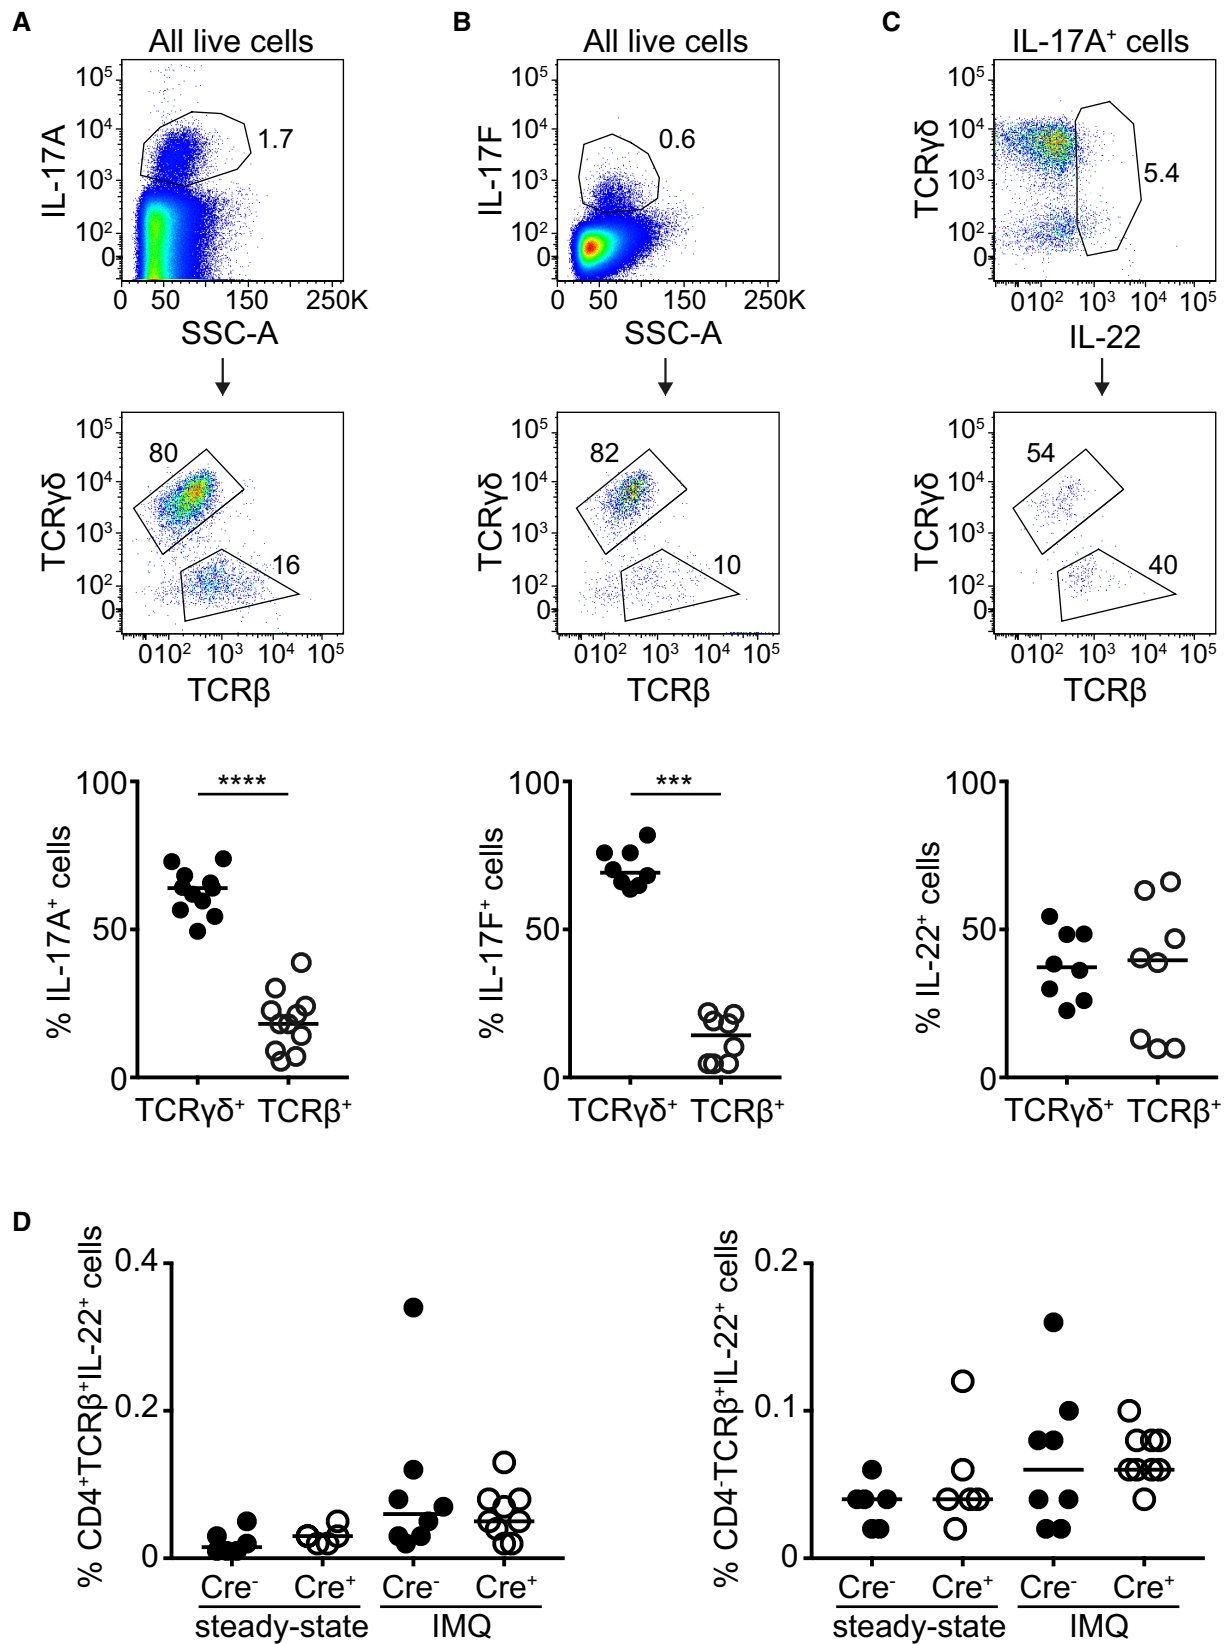

Figure EV5.
